# Supplementary material for: The comparison of catheter ablation on hard outcomes versus medical treatment for atrial fibrillation patients: A meta-analysis of randomized, controlled trials with trial sequential analysis
Source: PLoS One. 2022 Jan 19;17(1):e0262702. doi: 10.1371/journal.pone.0262702 (PMC8769301; doi:10.1371/journal.pone.0262702)
Supplement: S1 File — (XLSX) [file pone.0262702.s014.xlsx]

## Sheet: original date
		stroke/TIA											death
studies	year	Events1	b1	Total1	Events2	d1	Total2			studies	year	Events1	b1	Total1	Events2	d1	Total2
MacDonald 2010	2010	1	21	22	0	19	19			MacDonald 2010	2010	NR	NR	NR	NR	NR	NR
Wilber 2010	2010	0	106	106	0	61	61			Wilber 2010	2010	1	105	106	0	61	61
Pappone 2011	2011	0	99	99	0	99	99			Pappone 2011	2011	0	99	99	0	99	99
Nielsen 2012	2012	1	145	146	1	147	148			Nielsen 2012	2012	2	144	146	4	144	148
Packer 2013	2013	7	156	163	0	82	82			Packer 2013	2013	1	162	163	0	82	82
Jones 2013	2013	0	26	26	1	25	26			Jones 2013	2013	1	25	26	0	26	26
Mont 2013	2013	0	98	98	0	48	48			Mont 2013	2013	0	98	98	0	48	48
Hunter 2014	2014	1	25	26	1	23	24			Hunter 2014	2014	0	26	26	1	23	24
Hummel 2014	2014	1	137	138	0	72	72			Hummel 2014	2014	0	138	138	0	72	72
Morillo 2014	2014	0	66	66	0	61	61			Morillo 2014	2014	0	66	66	0	61	61
Biase 2016	2016	NR	NR	NR	NR	NR	NR			Biase 2016	2016	8	94	102	18	83	101
Prabhu 2017	2017	NR	NR	NR	NR	NR	NR			Prabhu 2017	2017	NR	NR	NR	NR	NR	NR
Marrouche 2018	2018	5	174	179	11	173	184			Marrouche 2018	2018	24	155	179	46	138	184
Packer 2019	2019	3	1105	1108	7	1092	1096			Packer 2019	2019	58	1050	1108	67	1029	1096
Wu 2020	2020	14	313	327	23	298	321			Wu2020	2020	5	322	327	5	316	321
Kuck2020	2020	0	102	102	1	107	108
Jason2020	2020	0	154	154	1	148	149
								5258
		change in LVEF
studies	year	mean1	SD1	total1	mean2	SD2	total2
MacDonald 2010	2010	4.5	11.1	22	2.8	6.7	19					sinus rhythm maintain after treatment
Wilber 2010	2010	NR	NR	NR	NR	NR	NR					CA			MT
Pappone 2011	2011	NR	NR	NR	NR	NR	NR			studies	year	Events1	b1	Total1	Events2	d1	Total2
Nielsen 2012	2012	NR	NR	NR	NR	NR	NR			MacDonald et al.2010	2010	11	11	22	0	19	19
Packer 2013	2013	NR	NR	NR	NR	NR	NR			Pappone et al.2011	2011	72	27	99	12	87	99
Jones 2013	2013	10.9	11.5	26	5.4	8.5	26			Jones et al.2013	2013	22	3	25	2	24	26
Mont 2013	2013	NR	NR	NR	NR	NR	NR			Mont et al.2013	2013	72	26	98	21	27	48
Hunter 2014	2014	8.1	12.5	26	-3.6	9.7	24			Hunter et al.2014	2014	19	7	26	0	24	24
Hummel 2014	2014	3.6	7.1	138	2.1	6.7	72			Marrouche et al.2018	2018	113	66	179	40	144	184
Morillo 2014	2014	NR	NR	NR	NR	NR	NR			Wu et al.2020	2020	198	129	327	67	254	321
Biase 2016	2016	8.1	4	102	6.2	5	101
Prabhu 2017	2017	18.3	10.3	33	4.4	8.3	33
Marrouche 2018	2018	9.86	12.64	164	4.66	14.28	172
Packer 2019	2019	NR	NR	NR	NR	NR	NR

## Sheet: to the software
		stroke/TIA										ye initial data+累积meta		about:stoke/TIA
studies	year	Events1	b1	Total1	Events2	d1	Total2					studies	year	Events1	b1	Total1	Events2	d1	Total2	total
MacDonald 2010	2010	1	21	22	0	19	19					Krittayaphong,2003	2003	0	15	15	0	15	15	30
Wilber 2010	2010	0	106	106	0	61	61					Wazni,2005	2005	0	33	33	0	37	37	70
Pappone 2011	2011	0	99	99	0	99	99					Oral,2006	2006	0	77	77	0	69	69	146
Nielsen 2012	2012	1	145	146	1	147	148					Stabile,2006	2006	0	68	68	1	68	69	137
Packer 2013	2013	7	156	163	0	82	82					Jais,2008	2008	0	53	53	0	59	59	112
Jones 2013	2013	0	26	26	1	25	26					Forleo,2009	2009	0	35	35	0	35	35	70
Mont 2013	2013	0	98	98	0	48	48					MacDonald 2010	2010	1	21	22	0	19	19	41
Hunter 2014	2014	1	25	26	1	23	24					Wilber,2010	2010	0	106	106	0	61	61	167
Hummel 2014	2014	1	137	138	0	72	72					Pappone,2011	2011	0	99	99	0	99	99	198
Morillo 2014	2014	0	66	66	0	61	61					Nielsen 2012	2012	1	145	146	1	147	148	294
Marrouche 2018	2018	5	174	179	11	173	184					Jones 2013	2013	0	26	26	1	25	26	52
Packer 2019	2019	3	1105	1108	7	1092	1096					Packer,2013	2013	5	158	163	0	82	82	245
Wu 2020	2020	14	313	327	23	298	321					Hunter 2014	2014	1	25	26	1	23	24	50
Kuck2020	2020	0	102	102	1	107	108					Mont,2014	2014	0	98	98	0	48	48	146
Jason2020	2020	0	154	154	1	148	149					Hummel,2014	2014	1	137	138	0	72	72	210
												Morillo,2014	2014	0	66	66	0	61	61	127
			death									Marrouche 2018	2018	5	174	179	11	173	184	363
studies	year	Events1	b1	Total1	Events2	d1	Total2					Packer 2019	2019	3	1105	1108	7	1092	1096	2204
Wilber 2010	2010	1	105	106	0	61	61					Wu 2020	2020	14	313	327	23	298	321	648
Pappone 2011	2011	0	99	99	0	99	99					Kuck2020	2020	0	102	102	1	107	108	210
Nielsen 2012	2012	2	144	146	4	144	148					Jason2020	2020	0	154	154	1	148	149	303
Packer 2013	2013	1	162	163	0	82	82
Jones 2013	2013	1	25	26	0	26	26
Mont 2013	2013	0	98	98	0	48	48
Hunter 2014	2014	0	26	26	1	23	24
Hummel 2014	2014	0	138	138	0	72	72
Morillo 2014	2014	0	66	66	0	61	61
Biase 2016	2016	8	94	102	18	83	101
Marrouche 2018	2018	24	155	179	46	138	184
Packer 2019	2019	58	1050	1108	67	1029	1096
Wu2020	2020	5	322	327	5	316	321
		change in LVEF
studies	year	mean1	SD1	total1	mean2	SD2	total2	subgroup			follow up
MacDonald 2010	2010	4.5	11.1	22	2.8	6.7	19	1			follow up time:6months
Jones 2013	2013	10.9	11.5	26	5.4	8.5	26	1			follow up time:≥12months
Hunter 2014	2014	8.1	12.5	26	-3.6	9.7	24	2			follow up time:6months
Hummel 2014	2014	3.6	7.1	138	2.1	6.7	72	1			follow up time:6months
Biase 2016	2016	8.1	4	102	6.2	5	101	1			follow up time:≥12months
Prabhu 2017	2017	18.3	10.3	33	4.4	8.3	33	2			follow up time:6months
Marrouche 2018	2018	9.86	12.64	164	4.66	14.28	172	1			follow up time:≥12months
			sinus rhythm maintain after treatment
			CA			MT
	studies	year	Events1	b1	Total1	Events2	d1	Total2
	MacDonald et al.2010	2010	11	11	22	0	19	19
	Pappone et al.2011	2011	72	27	99	12	87	99
	Jones et al.2013	2013	22	3	25	2	24	26
	Mont et al.2013	2013	72	26	98	21	27	48
	Hunter et al.2014	2014	19	7	26	0	24	24
	Marrouche et al.2018	2018	113	66	179	40	144	184
	Wu et al.2020	2020	198	129	327	67	254	321
